# Supplementary material
Source: Springer Nature journal article supplement (https://www.springermedizin.de/resource/supplementary/12888_2013_1444_MOESM1_ESM.pdf/9480294)
Supplement: MOESM1 [file 9480294]

**Recruited to study**  
N = 59

**Time 1– allocated to treatment condition and assessed at baseline:**  
N=30

**Time 2 Assessment N=28**  
Missing self-report data N=2  
Missing informant data N= 4  
Did not complete treatment N=6

**ITT analysis N=30**  
Imputed data at Time 2:  
N=2 self-report and N=4 informant report data

**Time 1– allocated to control condition and assessed at baseline:**  
N=29

**Time 2 Assessment N=20**  
Missing self-report data: N= 9  
Missing informant data: N=11

**Included for ITT analysis: N=29**  
Imputed data at Time 2:  
N=9 self-report and N=11 informant report data
